# Supplementary material
Source: ML conference proceedings conference paper supplement (https://openaccess.thecvf.com/content/CVPR2024/html/Vargas_BiPer_Binary_Neural_CVPR_2024_paper.html)
Supplement: Supplementary file 1 [file Vargas_BiPer_Binary_Neural_CVPR_2024_supplemental.pdf]

# Supplementary Material

## BiPer: Binary Neural Networks using a Periodic Function

Edwin Vargas<sup>1,†</sup>, Claudia V. Correa<sup>1</sup>, Carlos Hinojosa<sup>2</sup>, Henry Arguello<sup>1</sup>

<sup>1</sup>Universidad Industrial de Santander (UIS); <sup>2</sup>King Abdullah University of Science and Technology

<sup>†</sup>edwin.vargas4@correo.uis.edu.co

### Introduction

This supplementary document provides details on the mathematical development of the quantization error analysis from section 4.1; the derivation of the quantization error equation for BiPer in Eq. (18); and additional results for the frequency effect on the VGG-small architecture with CIFAR-10 dataset.

### 1. Convergence of summation in Eq. (14) to Eq. (15).

Recalling Eq. (14), the distribution of the weights for an arbitrary frequency  $\omega_0$  is given by

$$f_{\mathcal{W}}(\hat{w}) = \sum_{k=-\infty}^{\infty} \frac{1}{2b\omega_0} \frac{1}{\sqrt{1-\hat{w}^2}} \exp\left(\frac{-|(-1)^k \arcsin(\hat{w}) + \pi k|}{b\omega_0}\right). \quad (1)$$

Considering that  $-\pi/2 \leq \arcsin(\hat{w}) \leq \pi/2$ , if  $k < 1$  the absolute value in the exponential term is negative. Therefore,

$$|(-1)^k \arcsin(\hat{w}) + \pi k| = -((-1)^k \arcsin(\hat{w}) + \pi k). \quad (2)$$

Conversely, if  $k > 1$

$$|(-1)^k \arcsin(\hat{w}) + \pi k| = (-1)^k \arcsin(\hat{w}) + \pi k. \quad (3)$$

Using Eqs. (2) and (3), we can rewrite the summation in Eq. (1) as

$$\begin{aligned} f_{\mathcal{W}}(\hat{w}) &= \alpha \exp\left(-\frac{|\arcsin(\hat{w})|}{b\omega_0}\right) \\ &+ \alpha \sum_{k=-\infty}^{-1} \exp\left(\frac{(-1)^k \arcsin(\hat{w}) + \pi k}{b\omega_0}\right) \\ &+ \alpha \sum_{k=1}^{\infty} \exp\left(\frac{-(-1)^k \arcsin(\hat{w}) - \pi k}{b\omega_0}\right), \end{aligned} \quad (4)$$

where  $\alpha = \frac{1}{2b\omega_0} \frac{1}{\sqrt{1-\hat{w}^2}}$ . The first summation can be rewritten as

$$\begin{aligned} &\sum_{k=-\infty}^{-1} \exp\left(\frac{(-1)^k \arcsin(\hat{w}) + \pi k}{b\omega_0}\right) \\ &= \sum_{k=-\infty}^1 \exp\left(\frac{(-1)^k \arcsin(\hat{w}) - \pi k}{b\omega_0}\right). \end{aligned} \quad (5)$$

Replacing Eq. (5) in Eq. (4) we obtain

$$\begin{aligned} f_{\mathcal{W}}(\hat{w}) &= \alpha \exp\left(-\frac{|\arcsin(\hat{w})|}{b\omega_0}\right) \\ &+ \alpha \sum_{k=1}^{\infty} \exp\left(\frac{(-1)^k \arcsin(\hat{w})}{b\omega_0}\right) \exp\left(\frac{-\pi k}{b\omega_0}\right) \\ &+ \alpha \sum_{k=1}^{\infty} \exp\left(\frac{-(-1)^k \arcsin(\hat{w})}{b\omega_0}\right) \exp\left(\frac{-\pi k}{b\omega_0}\right) \end{aligned} \quad (6)$$

Using the fact that  $\cosh(x) = \frac{\exp(x) + \exp(-x)}{2}$  is an even function, and the convergence of the harmonic series, we finally obtain the pdf of BiPer weights

$$\begin{aligned} f_{\mathcal{W}}(\hat{w}) &= \frac{1}{2b\omega_0} \frac{1}{\sqrt{1-\hat{w}^2}} \exp\left(\frac{-|\arcsin(\hat{w})|}{b\omega_0}\right) \\ &+ \frac{1}{2b\omega_0} \frac{1}{\sqrt{1-\hat{w}^2}} \cosh\left(\frac{\arcsin(\hat{w})}{b\omega_0}\right) \frac{1}{e^{\pi/b\omega_0} - 1}. \end{aligned} \quad (7)$$

### 2. Derivation of Quantization Error from Eq.(18)

To obtain the QE expression for BiPer in Eq. (19), we start with its general formulation in Eq. (18) given by

$$\text{QE} = \int_0^{+\infty} \frac{1}{b} \exp\left(\frac{-w}{b}\right) (|\sin(\omega_0 w)| - \gamma)^2 dw. \quad (8)$$

Expanding the square term and splitting it into three integrals yields

$$\begin{aligned}
\text{QE} &= \int_0^{+\infty} \frac{1}{b} \exp\left(\frac{-w}{b}\right) \sin(\omega_0 w)^2 dw \quad (9) \\
&+ \gamma \int_0^{+\infty} \frac{1}{b} \exp\left(\frac{-w}{b}\right) |\sin(\omega_0 w)| dw \\
&+ \gamma^2 \int_0^{+\infty} \frac{1}{b} \exp\left(\frac{-w}{b}\right) dw
\end{aligned}$$

For the first integral we use the trigonometric identity  $\sin^2(x) = 0.5 - 0.5\cos(2x)$ , and integrating by parts leading to

$$\frac{2(\omega_0 b)^2}{4(\omega_0 b)^2 + 1}. \quad (10)$$

Similarly, for the second integral, we used the fact that  $|\sin(x)| = \sqrt{\sin^2(x)}$ , and integrated by parts so that the solution can be written as

$$\frac{2\gamma\omega_0 b (e^{\pi/\omega_0 b} + 1)}{(\omega_0 b)^2 + 1 (e^{\pi/\omega_0 b} - 1)}. \quad (11)$$

For the third integral, note that it can be seen as the distribution of a probability density function, which is equal to one. Therefore, its solution reduces to  $\gamma^2$ . Summarizing, the QE for BiPer can be written as

$$\text{QE} = \frac{2(\omega_0 b)^2}{4(\omega_0 b)^2 + 1} - \frac{2\gamma\omega_0 b (e^{\pi/\omega_0 b} + 1)}{(\omega_0 b)^2 + 1 (e^{\pi/\omega_0 b} - 1)} + \gamma^2. \quad (12)$$

### 3. Additional results for VGG-small architecture on CIFAR 10

This section presents image classification results on the CIFAR-10 dataset using the VGG-small architecture.

Figure 1 illustrates the obtained stage 1 results for (a) Top-1 validation precision, (b) QE, and (c) maximum likelihood estimated parameter  $b$ . This figure complements Fig. 4 in the manuscript for VGG small architecture.

These results consistently resemble those obtained for the Resnet-18 architecture, where ensuring the lowest QE in Stage 1 does not result in the best network performance. For this case, we found that an intermediate frequency  $\omega_0 = 10$  balances the initial QE and precision of the full binary model.

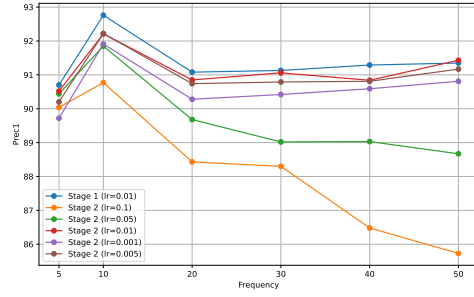

(a)  $\omega_0$  vs. Top-1 Precision

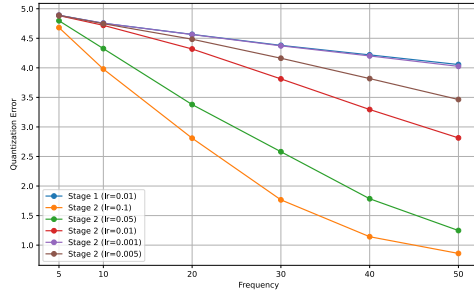

(b)  $\omega_0$  vs. QE

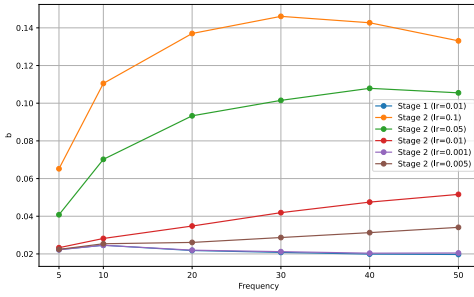

(c)  $\omega_0$  vs.  $b$

Figure 1. Impact of the frequency of the periodic function  $\omega_0$  on BiPer for VGG-small architecture (a) Top-1 classification precision, (b) Quantization error and, (c) Weight distribution parameter  $b$ , for the CIFAR-10 dataset.
